# Supplementary material
Source: publisher figshare collection journal article supplement (https://sage.figshare.com/ndownloader/files/15433352)
Supplement: Supplementary file 1 [file 15433352]

Las memorias entre épocas: las presidentas de ANFASEP antes y después del conflicto armado interno peruano

Mercedes Crisóstomo Meza

*Introducción[[1]](#endnote-2)*

En mayo de 1980, militantes del Partido Comunista del Perú – Sendero Luminoso (PCP-SL) quemaron las ánforas de votación del distrito de Chuschi (Ayacucho) que iban a ser usadas en las primeras elecciones generales tras doce años de dictadura militar. Este hecho fue reivindicado por el PCP-SL como el inicio de su «*guerra popular*».[[2]](#endnote-3) El Estado peruano enfrentó estas acciones, primero a través de la intervención policial y luego a través de las Fuerzas Armadas. Mientras el conflicto se desarrollaba surgieron nuevos actores armados como el Movimiento Revolucionario Túpac Amaru (MRTA), las rondas campesinas y grupos paramilitares. Esquemáticamente, es generalizada la idea de que la población civil y la más afectada por el conflicto armado interno estuvieron entre “dos fuegos”.[[3]](#endnote-4) En el 2001, tras veinte años de conflicto armado, el gobierno de transición creó la Comisión de la Verdad y Reconciliación (CVR) con el objetivo de investigar las violaciones a los derechos humanos y otros delitos cometidos en el contexto de la violencia desencadenada por los actores armados.

El *Informe Final* de la CVR (2003) señala que para el inicio del conflicto armado fue fundamental la voluntad política y militar del PCP-SL. Este se valió de las debilidades institucionales del Estado, crisis estructurales y frustraciones de distintos sectores de la sociedad peruana. Durante estos veinte años (1980-2000) los actores enfrentados en armas cometieron graves violaciones a los derechos humanos: asesinatos, secuestros, detenciones arbitrarias, desapariciones forzadas, desplazamientos forzados, violaciones sexuales y torturas. Según la CVR, el mayor perpetrador fue el PCP-SL seguido de las Fuerzas Armadas. El conflicto armado interno fue el de mayor duración, intensidad y elevados costos económicos y humanos de toda la historia republicana peruana. Además, se desarrolló durante gobiernos elegidos democráticamente.[[4]](#endnote-5) Adicionalmente, la CVR precisa que el conflicto armado afectó principalmente a las poblaciones más pobres, rurales e indígenas del país. Las desigualdades, etnicidad, clase y género determinaron el perfil de las víctimas. Igualmente, la CVR documenta que la mayor parte de personas asesinadas, secuestradas y/o desaparecidas fueron hombres mientras que las mujeres fueron más afectadas por violencia sexual.

En ese contexto de violencia extrema surgió la Asociación Nacional de Familiares de Secuestrados, Detenidos y Desaparecidos del Perú (ANFASEP), la primera organización de familiares de víctimas del conflicto armado interno creada en el Perú, fundamentalmente integrada por mujeres quechua-hablantes.

Los estudios realizados sobre ANFASEP se han centrado en analizar a la organización como un actor colectivo, precisamente debido a su importancia durante y después del conflicto armado interno. Sin embargo, este artículo aporta una perspectiva analítica diferente, primero porque no se centra en el estudio de ANFASEP ni en sus logros como organización y segundo porque profundiza en las etapas tempranas de vida de las presidentas de ANFASEP y por lo tanto se enfoca en los años previos al conflicto armado. Esta es un temática que no se ha estudiado antes y abordarla proporciona una perspectiva amplia sobre las presidentas de ANFASEP y las mujeres líderes de organizaciones de familiares en general.

Las preguntas que guían este análisis son ¿cómo era la vida de las presidentas de ANFASEP antes del conflicto armado interno?, ¿cuáles son sus lógicas de posicionamiento en post conflicto? y ¿cuál es la relación de sus experiencias previas al conflicto con sus logros durante y el post conflicto? Planteo estas preguntas porque en la academia y el activismo existe la noción de que las integrantes de ANFASEP y sus presidentas, en particular, se empoderaron durante el conflicto armado. Precisamente centrarse en sus vivencias previas al conflicto permite cuestionar estos argumentos, así como los estereotipos que se han hecho sobre ellas.

Para el diálogo con ellas, opté por un acercamiento metodológico cualitativo y trabajé sus historias de vida, “[…] una historia de vida recopilada por medio de la entrevista oral es el resumen condensado de una historia social individual, es también susceptible de ser representada de innumerables maneras en función del contexto en el cual es relatada” (Pollak, 2006: 30). Además, use fuentes escritas.[[5]](#endnote-6) En las entrevistas dialogamos sobre sus ciclos de vida previos al conflicto armado interno: infancia, matrimonio e inicio de su maternidad, muchas de estas narraciones estuvieron impregnadas de sus memorias del conflicto y post- conflicto.[[6]](#endnote-7) Sommer (2005) en el análisis de los testimonios brindados por Rigoberta Menchú a sus distintos entrevistadores, sugiere que trabajar con narraciones sobre las memorias de las mujeres que vivieron directamente conflictos armados implica un proceso consciente e inconsciente, voluntario e involuntario de quien narra, pues debe de reordenar, jerarquizar, silenciar y nombrar algunos episodios en relación a otros. Y, a su vez, quien escucha —en este caso la investigadora— también elabora otro proceso de resignificación de la historia que le ha sido narrada. La investigadora llega a ser no sólo testigo, sino también participe en “conversaciones” de las cuales su propia narrativa jamás podrá independizarse. Así, los temas de memoria implican un doble proceso de resignificación de las memorias de la entrevistada y de la entrevistadora. Por ello, asumí el proceso de entrevistas no como una batería de preguntas formuladas a las que hay que responder, sino como una conversación donde se intercambian experiencias y puntos de vista. En tanto las presidentes de ANFASEP hablan quechua y castellano realicé las entrevistas en ambos idiomas.

A nivel teórico me ha sido de utilidad las reflexiones sobre memoria entendida como un proceso de selección donde ha sido preciso escoger entre todas las informaciones, en nombre de ciertos criterios consientes o no, para orientar la utilización que haremos del pasado (Todorov, 2010). La memoria tiene un papel altamente significativo como mecanismo cultural para fortalecer el sentido de pertenencia y así construir mayor confianza en uno/a mismo/a (Jelín, 2012). Otro concepto útil es la relación entre género y memoria, ya que hay diferencias claras en la forma como los hombres y las mujeres recuerdan, esto tiene que ver con la socialización temprana de género. Las presidentas de ANFASEP tienden a recordar la vida cotidiana, lo que ocurría en sus familias y comunidades. Recuerdan en el marco de las relaciones familiares porque el tiempo subjetivo de las mujeres está organizado y ligado a los hechos reproductivos. Las voces de las mujeres cuentan historias diferentes a la de los hombres y de esa manera introducen una pluralidad en los puntos de vista (Leydesdorff, Passerini y Tompson, 1996; Ely y MacCabe, 2009; Jelin, 2012). Para reflexionar sobre la noción de estereotipos diálogo con Bhabha (2011) y Mohanty (2008) cuando plantean que la esencialización y el estereotipo son un rasgo importante del discurso colonial que “fija” la construcción de la ideología de los otros y sobre los otros, este es un modo paradójico de representación, pues hace referencia a lo rígido e inmutable y niega las diferencias. Bhabha plantean que el estereotipo es ambivalente, por un lado su objetivo es la fijación y por el otro la repetición de lo que debe fijarse, precisamente lo que identifico en las construcción de estereotipos en relación a las integrantes y presidentas de ANFASEP.

Para responder a las preguntas que he planteado, he organizado este artículo en cinco partes. Primero presento brevemente a ANFASEP. Luego reviso críticamente los estudios que han analizado a ANFASEP, diferencio lo que ANFASEP dice de sí misma respecto de lo que académicos e instituciones analizan sobre esta organización. Después, presento las memorias de las presidentas de ANFASEP sobre su infancia, matrimonio y maternidad porque fueron sus etapas de vida previas al conflicto armado. En la cuarta sección analizo los referentes de sus identidades tempranas y el impacto de estas en sus luchas durante el conflicto armado. En las conclusiones, reflexiono sobre la recreación de sus memorias que devienen en nuevos sentidos de identidad y en nuevas lógicas de posicionamiento en el post conflicto armado.

*1. ANFASEP: trayectoria y legado*

Jelin (2012), Molyneux (2001) y Craske (1999) detallan que, en América Latina, las mujeres que atravesaron procesos de conflicto armado y dictadura tuvieron dos tipos de acciones. En el espacio público crearon organizaciones de derechos humanos para buscar a sus familiares desaparecidos y en el espacio privado desplegaron “la lucha” por la subsistencia familiar. Este es el caso de ANFASEP que se formó durante los primeros años del conflicto (1983) y en la zona más afectada por este (Ayacucho). Su objetivo era y es buscar a las personas desaparecidas y demandar verdad, justicia y reparación. ANFASEP es una organización emblemática para el Perú, no solo porque es la primera de su genero sino y sobre todo porque desde su creación hasta la actualidad se ha convertido en un referente y actor sociopolítico de defensa de la democracia y los derechos humanos.[[7]](#endnote-8) Con el liderazgo de sus presidentas y en distintos momentos crearon un comedor para proveer de alimentos y cobijo a los niños huérfanos por el conflicto armado, apoyaron testimoniando e identificando fosas comunes durante el proceso abierto por la CVR, en el 2005 inauguraron el primer museo de la memoria del Perú y ahora demandan que lo que fuera el cuartel del Ejército “Los Cabitos” se convierta en un lugar de memoria.[[8]](#endnote-9)

Para sus integrantes, ANFASEP es como “su familia” donde se sienten acogidas, respaldadas, seguras y en algunos casos también donde discuten y discrepan, en términos de Pollak, una comunidad afectiva que sobre todo funciona como una red de soporte reciproco.[[9]](#endnote-10)

El proceso de consolidación de ANFASEP ha sido complejo. Han afrontado crisis internas y externas. Sus integrantes han sido amenazadas de muerte, perseguidas, acusadas de ser senderistas e incluso una de sus primeras dirigentes, Guadalupe Ccallocunto fue desaparecida por las Fuerzas Armadas. En medio de este contexto adverso, han tenido el apoyo económico e institucional de distintas personalidades e instituciones nacionales e internacionales, con el cual han desarrollado acciones de asesorías jurídicas, atención en salud mental, pequeños proyectos productivos, preservación de la memoria e incidencia política.

Las integrantes de ANFASEP portando una cruz, fotografías de sus familiares desaparecidos y banderolas hechas por ellas mismas han marchado por las calles y realizado protestas ante las instituciones llamadas a proteger los derechos humanos. Pero, durante los años del conflicto armado, los gobiernos de Fernando Belaúnde (1980-1985), Alan García (1985-1990) y Alberto Fujimori (1990-2000) no atendieron sus demandas ni sus pedidos de justicia. Contrariamente, cuantas más marchas y manifestaciones realizaban, las amenazas y el amedrentamiento se intensificaban.

Las integrantes de ANFASEP se definen como madres, esposas, hermanas, hijas de víctimas inocentes del conflicto armado que no tenían ninguna filiación política partidaria. Sus familiares fueron asesinados o desaparecidos cuando se dirigían a estudiar y/o trabajar o porque fueron detenidas de forma arbitraria injustamente acusados de ser senderistas. La CVR ha señalado que durante del conflicto armado bastaba ser joven, estudiante o haber nacido en Ayacucho para ser sospechoso de ser senderista y ser desaparecido.

ANFASEP tiene alrededor de 200 integrantes, quienes forman la asamblea de socias, la que elije la junta directiva. La junta directiva la lideran las presidentas. Desde su creación hasta la fecha de las entrevistas (2014), ANFASEP ha tenido cinco presidentas. Eso debido al riesgo y temor que implicaba asumir dicho cargo durante los años del conflicto. La alternancia en la presidencia comenzó, recién en el 2005 e incluso con reelecciones. Este artículo se centra en las presidentas de ANFASEP porque no solo han representado a la organización, también han sido intermediarias políticas que trasmiten sentidos, discursos y demandas.[[10]](#endnote-11)

*2. Revisión de la literatura sobre ANFASEP: identificando la producción de estereotipos*

“Luego de la instalación del Comando Político-Militar en los primeros meses de 1983, se multiplicaron las víctimas de la violencia. Los familiares en su mayoría mujeres, a veces acompañados de sus menores hijos, llorando transitaban las calles ayacuchanas en busca de sus seres queridos” (ANFASEP, 2007: 26). Esta cita es gráfica de la forma en la que las propias integrantes de ANFASEP definen el inicio de la asociación. En el libro *¿Hasta cuándo tu silencio?*, ANFASEP da cuenta de los procesos que han vivido durante y después del conflicto armado y de su labor como “hacedoras de paz” y “actoras”. Presentan testimonios “de valor y coraje” donde sus integrantes narran sus experiencias con la violencia y como han sobrevivido a ella. Destacan que durante el conflicto armado crearon un comedor popular que fue un espacio de ayuda y contención, revaloran la adquisición de su local institucional, su apoyo a la creación de la Coordinadora Nacional de Derechos Humanos y su aporte a la CVR. También, enfatizan que crearon el primer museo de la memoria del Perú.[[11]](#endnote-12) Desde una perspectiva critica, este auto-relato no plantea ningún análisis sobre sus desencuentros en la interrelación con el Estado y los organismos no gubernamentales.

Por otro lado, las reseñas institucionales sobre ANFASEP han sido elaboradas por organismos de derechos humanos. La Defensoría del Pueblo (2002), la Comisión de Derechos Humanos (2001) y Consejería en Proyectos (2004) sugieren que ANFASEP fue como espacio para la búsqueda, denuncia colectiva, contención mutua, apoyo moral y fuente de apoyo económico para sus miembros durante los años del conflicto armado. Resaltan su labor como madres y esposas buscadoras de personas desaparecidas, que con el tiempo identificaron centros de detención y fosas comunes. La Defensoría del Pueblo destaca la labor de incidencia hecha por ANFASEP a favor de la primera investigación sobre la situación de las personas desparecidas en el Perú.

Los estudios académicos sobre ANFASEP[[12]](#endnote-13) se han centrado en analizar su formación, etapas de consolidación, logros y aliados locales, nacionales e internacionales. Muñoz (1999) y Tamayo (2003) sugieren que las organizaciones de derechos humanos habrían promovido que las asociaciones de familiares de víctimas del Perú trabajen la metodología y procedimientos desarrollados por la Federación Latinoamericana de Asociaciones de Familiares Detenidos-Desaparecidos (FEDEFAM). Muñoz destaca que las integrantes de ANFASEP viajaban a Lima desde Ayacucho para aprender las formas de protesta donde se usaban fotos de los parientes desaparecidos, la resistencia al desalojo violento de la policía y como declarar ante los periodistas. Tamayo reseña que la formalización de ANFASEP se dio a partir de su constitución como asociación de derecho privado en 1990 y por la adquisición de un local propio en 1991. Identifica el período del 1992 al 2000 como una etapa de debilitamiento porque muchos familiares dejaron de participar ante el amedrentamiento, persecución y acusaciones de terroristas que vivieron sus dirigentes por parte del Estado. Cóndor (2007) analiza la dinámica interna de ANFASEP y establece que hay un cambio generacional entre las madres quienes se perciben como víctimas a diferencia de sus hijos e hijas que no se sienten víctimas directas del conflicto. Esto podría ser una de las causas de los conflictos intergeneracionales al interior de esta organización. Cóndor y Muñoz coindicen al plantear que las ONG tienen vínculos de tipo paternalista y vertical con ANFASEP. Tamayo precisa que la asociación es de naturaleza matriarcal y caudillista porque ha tenido la misma junta directiva por varios años. Estos análisis sobre ANFASEP se centran en la asociación y las dinámicas que establecen sus integrantes en tanto representantes e integrantes de la misma. A su vez, plantean caracterizaciones sobre sus integrantes. Destacan su doble función de víctima y heroína y la capacidad de resistencia, resiliencia, agencia y empoderamiento que tuvieron para formar ANFASEP, mantener a sus hijos y trabajar la agenda de los derechos humanos en un contexto altamente violento y represivo (Reynaga, 2008). Cóndor (2007), Muñoz (1999) and Tamayo (2003) caracterizan a sus integrantes como mujeres quechua-hablantes, de origen rural, analfabetas, ancianas, pobres, sin autonomía y desconocedoras del castellano. Señalan que fueron la base social de las ONG en un contexto de defensa y denuncia de violaciones a los derechos humanos y que aprendieron que tienen derechos en un contexto de guerra. [[13]](#endnote-14)Concluyen que las integrantes de ANFASEP habrían sido estigmatizadas y discriminadas y que tienen una autoimagen de desvalimiento institucional debido al olvido de las autoridades y a su insuficiente *conciencia ciudadana*. Se las analiza como mujeres desconocedoras de los procesos judiciales y espacios donde colocar denuncias sobre la desaparición de sus familiares. Esto es presentado como una muestra de su incipiente noción de ciudadanía y de una falta de consciencia de ser sujetos de derecho. Cuestionaré estas conclusiones en las siguientes secciones.

*3. Las presidentas de ANFASEP: infancia y matrimonio*

Las vivencias que las presidentas de ANFASEP: Angélica, Felicitas, Lidia, Elena y Adelina tuvieron antes del conflicto armado interno están vinculadas con temporalidades que abarcan, los primeros años del siglo XX en las zonas rurales de Ayacucho.

## 3.1. Predominancia de las haciendas: la historia de Angélica*[[14]](#endnote-15)*

Hacia 1920, Ayacucho era una región eminentemente rural con una población dedicada principalmente a la agricultura. En el marco de la ley de conscripción vial impulsada por el gobierno de Augusto Leguía (1919-1930), los campesinos comenzaron a construir carreteras. Esta incipiente ampliación de la red vial contrastaba con el elevado porcentaje de personas iletradas que vivían en Ayacucho. Igualmente, coexistían las haciendas donde predominaban las relaciones de subordinación del campesinado por parte de los hacendados. Estos usualmente eran elegidos como autoridades y representantes del Estado; salvo está débil y arbitraria representación, además de la escuela, en estas zonas no había mayor presencia estatal. Angélica Mendoza, fundadora y primera presidenta de ANFASEP, nació en este contexto un octubre de 1928 en Huambalpa (Vilcashuamán). Ella, huérfana de padre desde los siete años se quedó a cargo de sus abuelos maternos, porque su madre volvió a casarse. Angélica recuerda que “los hacendados trataban a la gente de las comunidades como si fueran sus esclavos, día y noche trabajaban para ese patrón”.[[15]](#endnote-16) Ella no era parte de ninguno de estos sectores sociales, por lo contario, su familia poseía propiedades y animales y su abuelo materno era constantemente elegido autoridad. Angélica ha elaborado y/o recreado una memoria en la que su familia era acomodada económicamente y tenía un *status* que le otorgaba el respeto de los hacendados y campesinos. Esta memoria recreada, o no, sobre la posición de su familia le imprimió una dinámica de interrelación particular, “a mí desde chica la gente me respeta, yo les decía ‘por qué abusan a la gente, por qué tienen que estar peleando’. La gente me respetaba, porque mis abuelos eran autoridades”.

En la comunidad donde Angélica nació, se creó la primera escuela cuando ella tenía dieciséis años, ella recuerda que fue a la escuela solo por una semana. Relata: “he ido una semana a la escuela, pero mi abuelo y mi abuela no podían ponerse a trabajar, a pesar de que eran gente rico no me han puesto a la escuela, ‘tienes que ver los animales y tienes que ver que las empleadas pastan los animales, no hay tiempo para que vayas a la escuela, hay que ver esto, hay que ver lo otro”. La falta de acceso a la educación se convirtió en una “marca” para Angélica, que en términos de Jelin (2012) define los cursos de la vida, así como las acciones y visiones de su existencia e interacción social. Angélica recuerda que luego de ser obligada a abandonar sus estudios, también, fue obligada a casarse con su profesor, Estanislao Ascarza. Precisa, “pero yo no conocí el amor, mi mamá me ha entregado a ese señor, yo he llorado duro, he sufrido duro porque me entregaron a ese hombre desconocido, no podía acostumbrar. Antes era así la costumbre […]. Yo tengo cólera a mi madre porque no me ha hecho estudiar y me ha entregado a un hombre desconocido. Finalmente, pasé mi vida con él”. Al respecto, Earls y Silverblatt (1977) documentaron que en algunas zonas rurales, el matrimonio se realizaba por *concierto* entre los padres de los novios. Los padres se ponían de acuerdo para hacer casar a sus hijos sin que estos se conozcan. La propia experiencia de Angélica es una muestra de ello. El matrimonio arreglado permitía algún privilegio o compensación económica. En el caso de Angélica el matrimonio con su profesor[[16]](#endnote-17) le permitió mantener el *status* que la familia había tenido por estar vinculada al ejercicio de la autoridad.

Una vez casada, Angélica tuvo ocho hijos. Debido al trabajo de su esposo, vivieron en diferentes distritos rurales para finalmente asentarse en Ayacucho. La remuneración de su esposo alcanzaba para educar y criar a sus hijos, ella no tuvo la necesidad de trabajar. Es en relación a sus hijos, y cuando ya vivía en Huamanga (capital de Ayacucho), que Angélica se vio afectada por el conflicto armado. Justamente por esto, hablar con ella sobre su maternidad ha sido difícil porque recuerda a su hijo Arquímedes quién en 1983 a los diecinueve años fue secuestrado de su casa por integrantes del Ejército. Arquímedes era un joven estudiante que se estaba preparando para postular a la universidad. En su proceso de búsqueda, Angélica fundó ANFASEP junto a otras mujeres ayacuchanas, fue la primera presidenta de la asociación, la que la presidió más tiempo y en los momentos más difíciles del conflicto armado. Angélica falleció en el 2017, falleció sin haber encontrado justicia ni los restos de su hijo desaparecido.

## 3.2. La vida entre el campo y la ciudad: la historia de Felicitas[[17]](#endnote-18)

Felicitas Delgadillo nació en abril de 1949 en Carmen Alto (Huamanga). Sus padres fueron trabajadores de una hacienda, su mamá tuvo dieciséis hijos, de los cuales sólo sobrevivieron ella y sus tres hermanos. En Ayacucho, hacia 1940 los cambios que se producían en las zonas rurales eran más notorios, sobre todo, por la migración del campo a la ciudad. En el plano educativo, el incremento de escuelas fue significativo, pero a nivel político y económico aún coexistía el régimen de las haciendas (Zapata y otros, 2008). Felicitas recuerda “mucho abusaba ese hacendado a mi mamá […], era malo, malo, explotaba a la gente pobre, ni siquiera un terreno le han dado. Como ya no aguantaban esos maltratos, eran castigados, ya no aguantaban y de noche no más se han escapado”. Este caso permite ver que antes del conflicto armado en muchas comunidades aún imperaban relaciones coloniales a través del trabajo forzado del campesinado. Felicitas cuenta que sus padres huyeron de la hacienda y regresaron a vivir a Carmen Alto donde trabajaron como arrieros. Además, explica que sus padres querían que ella estudié; lo que hizo cuando cumplió diez años. De esta etapa de su vida, recuerda los juegos, los libros y las tareas escolares. Pero, cuando estaba en quinto de primaria dejo de estudiar por la mala economía familiar y casi paralelamente fue violentada y salió embarazada.

Después de varios años, Felicitas se casó con Teófilo Ramos quien trabajaba como registrador en la Municipalidad de San Juan Bautista. Felicitas se casó por lo que se denomina “la pedida”, ritual en el que el novio se acerca a la familia de la novia para pedirla en matrimonio. Mientras Felicitas vivía con su esposo y sus cinco hijos se dedicaba al cuidado de su familia y además trabajaba cosiendo ropa. Ella valora mucho el haber aprendido a coser “he sabido salir adelante, me he superado cuando me han enseñado [a coser], yo misma me he comprado mi maquinita, cosía en mi casa y vendía lo que cosía a mis clientes en el mercado. Yo cosía día y noche, […] con eso he salvado mi vida”. La maternidad y su trabajo como costurera se constituirán en elementos decisivos de su identidad para afrontar el conflicto armado que la afectó cuando integrantes del Ejército detuvieron a su esposo en 1986. Su esposo desapareció cuando ella tenía 37 años. Mientras Felicitas lo buscaba entre fosas y barrancos conoció ANFASEP donde ha sido parte de la junta directiva por muchos años.

## 3.3. El inicio de las transformaciones sociales: las historias de Lidia y Elena

En Ayacucho hacia fines de 1950 surgieron movimientos por la tierra que cuestionaban las situaciones de opresión y subordinación que vivían los campesinos en las haciendas. Paralelamente, los campesinos comenzaron a construir capillas, caminos, puentes, canales de riego y escuelas. En este contexto —y como también muestra la historia de Felicitas— la escuela fue el espacio vital para la transformación de las personas que vivían en las zonas rurales (Degregori, 2010). Pero la economía regional aún se sustentaba en la ganadería y agricultura de pequeña escala y de autoconsumo. En este contexto nacieron Lidia y Elena.

Lidia nació en marzo de 1952 en Carmen Alto (Huamanga), sus padres también nacieron en este distrito, tuvieron siete hijos y se dedicaron al arrieraje. Los arrieros eran “personas que se dedican a transportar productos de un lugar a otro en cortos y largos viajes según el cronograma del calendario o en cualquier mes del año, utilizando como medio de transporte las llamas, las mulas, caballos y burros, su condición económica se notaba en la cantidad de animales que poseían” (Velapatiño, 2003: 7). Esta actividad económica imprimió características específicas en la socialización de hombres y mujeres, así como en sus dinámicas económicas y sociales. Sobre su infancia, Lidia destaca que en sus vacaciones acompañaba a sus padres, “de aquí llevábamos a la puna a vender frazadas. Nosotros mismos hacíamos tejer. Eso llevábamos, eso vendíamos por metros”. Lidia estudió hasta cuarto de primaria en una escuela de niñas de Carmen Alto. De esta etapa recuerda a su profesora y sus libros. Además, enfatiza que participaba en las actuaciones y bailes que su profesora organizaba. Le gustaba usar su uniforme especial para los días de aniversarios y fiestas patrias. “Nuestra blusa especial era [color] mostacita, después nuestra gorrita, una cristina, eso era con los botones con sello”. Lidia dejó de estudiar a los catorce años debido a que su madre se enfermó. En ese momento, Lidia asumió nuevas responsabilidades para contribuir la economía familiar. Ella enfatiza que le gustaba estudiar y a su vez hacer negocios, por eso dejar la escuela no le generó malestar porque de todas maneras iba a dedicarse al comercio. En otro momento de la entrevista cuenta que, también, dejó de estudiar porque quedo embarazada de su primera hija de la cual tuvo que hacerse responsable sola.

Muchos años después, a los veinticinco años, Lidia se casó con Felipe Huamán y tuvieron cinco hijos. Él, también, provenía de una familia de arrieros y por ello juntos continuaron trabajando en esta actividad hasta que nacieron sus dos primeros hijos, al nacer el tercero, Lidia dejo el arrieraje. Pero en 1984 su esposo fue detenido y luego asesinado por un policía. Lidia quedó viuda a los treinta y cinco años y a cargo de sus hijos, incluyendo una bebe con pocos meses de edad. Ante estas circunstancias, retomó sus actividades como comerciante para mantener y educar a sus hijos. Se inscribió en ANFASEP a fines de 1984 y en el 2000 decidió participar activamente en la asociación. Asumió el cargo de presidenta por dos períodos. Ahora, sigue buscando justicia y sanción para el policía que asesinó a su esposo.

Por su parte, Elena nació en agosto de 1958 en Vilcanchos (Víctor Fajardo), vivió en una comunidad junto a sus padres, cinco hermanos y dos hermanastras. Sus padres se dedicaban al pastoreo de animales, “mi papá y mi mamá eran familias pobres que no tenían su sustento, entonces eran dedicados a pastear ganado, eran pastores, pasteaban de las personas que tenían ganados”. Su padre viajaba a la costa para trabajar en las haciendas y en algunas ocasiones ella trabajaba allí cuidando niños. Elena, a diferencia de las otras presidentas de ANFASEP, ha narrado hechos de descuido y violencia durante su infancia. A los once años, cuando regresó de trabajar en la costa comenzó sus estudios primarios, pero enfatiza que no logró terminarlos. Elena cuenta pocos detalles sobre su etapa escolar, por el contrario recuerda que faltaba a la escuela para pastear los animales en las estancias. Justamente por eso, sus memorias de esta etapa se centran en recuerdos vinculados con sus animales y el campo. Elena se casó a los dieciséis años con Claudio Choque quien se dedicaba al comercio. Juntos tuvieron cuatro hijos. De la vida con su esposo, Elena recuerda “hemos empezado a trabajar el [19]78 o [19]79, ya para el [19]83 teníamos una tiendita llenecita de comercio”. También, resalta que su esposo le ayudaba en el parto de sus hijos, pero ya no pudo hacerlo para el nacimiento de su última hija, porque meses antes fue asesinado. Elena quedo viuda a los veinticinco años y también huérfana porque el mismo año sus padres fueron desaparecidos, incluso ella estuvo detenida en la Comisaria de Paras (Cangallo provincia de Ayacucho). El comisario la amenazó y por miedo junto a sus hijos y hermanos se desplazó hacia la capital de Ayacucho donde trabajó como comerciante ambulante e invadió un terreno para tener un lugar donde vivir. Elena, a diferencia de las otras presidentas de ANFASEP, no vivía en la capital de Ayacucho cuando el conflicto armado la afectó. Ella se inscribió en ANFASEP en 1998 y entre el 2011 al 2012 fue presidenta de esta asociación.

*3.4. La consolidación de los cambios: la historia de Adelina*

En la década de 1960 se construyeron nuevas escuelas y colegios, se incrementaron las migraciones del campo a la ciudad, se acentuaron las luchas por las tierras, se profundizó la crisis de las haciendas (Zapata y otros, 2008) y se iniciaron las reformas del gobierno de Velasco Alvarado (1968-1975), entre ellas destaca la reforma agraria (1968) que puso fin a las relaciones de explotación del campesinado por parte de los hacendados. En este tiempo de profundización de transformaciones nació Adelina en enero de 1965 en Accomarca (provincia de Vilcashuamán). Durante su infancia, su familia estaba compuesta por su madre y su hermano. Su padre los “abandonó” cuando su hermano era pequeño y ella aún no nacía. Adelina precisa “mi mamá era sola, así también sola nos ha sacado adelante”. Ella recuerda las fiestas de su comunidad con mucha alegría, “cuando era niña en mi comunidad era bonito, en el mes de diciembre […] bailaban en navidad con arpa y violín. Eso era para nosotros nuestra fiesta”. Estudió primaria en una comunidad de Accomarca y a los trece años migró a Huamanga para proseguir sus estudios secundarios. Precisa, “pero cuando venimos del campo a la ciudad es un poco difícil, como no me acostumbrado quería regresarme”. Pero, su madre insistió para ella culmine sus estudios secundarios. Adelina ya vivía en Ayacucho cuando conoció a Zósimo Tenorio con quien se casó a los diecinueve años. Tuvieron una hija. De su vida matrimonial recuerda que su esposo le enseñó a cocinar “la comida de la ciudad”, que salían a pasear en moto y a comer en la calle los fines de semana. En 1983, a menos de dos años de casada su esposo fue detenido-desaparecido. Adelina quedo viuda a los veinte años. Desde esa fecha comenzó a buscarlo en delegaciones policiales y en las bases militares, así se contactó con Angélica quien la invitó a integrar ANFASEP. Desde ese momento, ha sido parte activa de la asociación y asumió el cargo de presidenta en dos periodos.

*4. Los referentes tempranos de identidad*

Lo antes presentado permite apreciar que las generalizaciones sobre las integrantes de ANFASEP como pobres, rurales, analfabetas, sin vínculos con el Estado, dependientes y sin capacidad de agencia han contribuido a elaborar estereotipos que las homogeneizan y victimizan. Sin quererlo, estas nociones dialogan con lo planteado en el Informe Uchuraccay que presentó a las poblaciones campesinas y andinas como parte de un mundo completamente diferenciado del resto del país, congelado en el tiempo, “atrasado” y “violento”.[[18]](#endnote-19) Este informe señaló que las comunidades de altura no tenían una clara conciencia del Estado, cuestionó su condición de ciudadanos y su ser sujetos de derechos. La masacre de los periodistas en la localidad de Uchuraccay fue presentada como resultado de un mal entendido generado por las diferencias culturales existentes entre los campesinos quechuas y el país urbano (CVR, 2003).[[19]](#endnote-20) Esto creó estereotipos que fijaron aún más en la opinión pública hegemónica prejuicios hacia la población andina y rural. A contracorriente, las narraciones sobre los primeros ciclos de vida de las presidentas de ANFASEP cuestionan estas caracterizaciones. En estos ciclos identifico ejes transversales a sus historias que dialogan mutuamente: la ética del trabajo, el anhelo educativo, la migración y cambios en los roles de género.

Felicitas y Lidia narraron que se dedicaron al arrieraje. Esta actividad no sólo permitía tener ingresos económicos, sino también, una forma de estar en sociedad y participar de las actividades familiares, lo que les posibilitó desarrollar habilidades sociales, políticas y económicas específicas como la negociación, persuasión e intercambio. Además, el hecho de caminar por distintos parajes y distintos niveles de temperatura permite desplegar cualidades personales particulares. La participación activa de las mujeres con la economía ha sido reflexionada por Ruiz-Bravo (2004) en términos de ética del trabajo. Esta autora analizó la formación de las identidades femeninas en el medio rural andino de la sierra sur (Puno) y de la costa norte (Piura) y concluyó que “existe una relación dialéctica entre los sistemas socioeconómicos, las matrices culturales, los sistemas de género y las identidades femeninas” (Ruiz-Bravo, 2004: 315). González (1999) hace un recuento histórico de la vinculación de las mujeres con la economía analizando las vivanderas de Ayacucho entre el siglo XIX y XX. Encuentra que la economía mercantil de los terratenientes fue remplazada por un nuevo poder económico formado por comerciantes y pequeños productores, los gremios más poderosos (comerciantes de ganado, panaderos y tejedores) eran mestizos que habitaban los barrios de la ciudad, donde predominaban las mujeres. Felicitas, Lidia, Elena y Adelina narraron que tuvieron una vinculación con el trabajo y el mercado mucho antes del conflicto armado. Las respuestas, agencias y destrezas que desplegaron para enfrentar el conflicto (presidir ANFASEP, movilizarse en defensa de los derechos humanos y confrontar a las autoridades) estuvieron influenciadas por sus experiencias y socializaciones previas, donde sus modelos de identidad fueron sus abuelos, padres, madres y los contextos de profundos cambios sociales y políticos en los que crecieron; y no solo las acciones de organizaciones de derechos humanos durante el conflicto armado.

Pese a sus circunstancias diversas, todas las presidentas de ANFASEP comenzaron sus estudios primarios entre los ocho y trece años, a excepción de Angélica que lo hizo a los dieciséis. La situación de Angélica difiere porque su familia tenía recursos económicos, pero en la coyuntura sociopolítica en la que ella creció aún no se asentaba la idea del derecho a la educación de las mujeres. El anhelo de los padres de Elena, Adelina y Felicitas por ver estudiar a sus hijas fue parte de un cambio en las percepciones y creencias sobre la educación de las mujeres. Sus historias se circunscriben entre 1960 y 1970 y nos hablan de cambios que marcaron nuevas pautas para las relaciones de género en las zonas rurales, las que produjeron cambios en las propias subjetividades de las mujeres que ahora ya podían acceder a la escuela.[[20]](#endnote-21) Los cambios también se dieron en torno al matrimonio. Probablemente, el caso de Angélica, que se casó alrededor de 1940 bajo la modalidad de “concierto” sea el punto de partida para dar cuenta de las transformaciones que experimentó esta institución en las comunidades ya que las otras presidentas de ANFASEP, en décadas posteriores, pudieron elegir con quién casarse. Las décadas en las que ellas contrajeron matrimonio son totalmente distintas, pese a ello, coinciden en haberse casado entre los quince y dieciocho años.

La migración fue un proceso que todas las presidentas de ANFASEP vivieron. Elena fue la única que migró a la costa para trabajar durante su infancia y la que se desplazó forzadamente debido al conflicto armado. A diferencia de las otras presidentas que migraron a la a capital de Ayacucho para estudiar. Estas distintas motivaciones y circunstancias de migración, las analizo como una forma de trascender el circulo de pertenencia y arraigo, la agencia no necesariamente radica en el proceso de migración sino en la decisión de ampliar sus horizontes y espacios de actuación desplazándose de su lugar de nacimiento. Retomando la noción de agencia-empoderamiento es necesario problematizar los argumentos que platean que las mujeres de ANFASEP se empoderaron a partir del conflicto armado. Pregunto, ¿por qué pensar que las acciones de los agentes externos como los organismos gubernamentales (urbanos, occidentales y educados) las empoderaron?

En base al análisis de sus experiencias y socializaciones tempranas concluyo que las presidentas de ANFASEP tenían un tipo de empoderamiento antes del conflicto armado, ellas estaban desplegando sus habilidades y agencias de acuerdo a sus contextos y circunstancias. Lidia había pedido un préstamo bancario para construir su casa, Adelina estaba gestionando un permiso municipal para ampliar su negocio y Elena tenía la tienda más importante de su comunidad. Nadie esperaba ni estaba preparado para una guerra, es lógico que hayan necesitado de la ayuda humanitaria para vivir porque la guerra destruyó sus vidas y proyectos.

Los estudios que analizan el siglo XIX documentan que las mujeres que vivían en la ciudad de Ayacucho y sus alrededores tenían experiencia en el uso de sistema judicial y los campesinos entablaban juicios a los hacendados (Ataurima, 2001; Urrutia, 1982). Lidia narró que en la década de 1970 estuvo involucrada en un juicio y tenía nociones sobre demandas y juzgados. Recordemos que los primeros años de 1980 en el Perú salíamos de un gobierno militar de doce años, el voto recién se universalizó en 1979, el Estado era débil y de presencia limitada en muchas zonas del país y había una estructura social y política que excluía y jerarquizaba profundamente lo indígena y rural. Por lo tanto, no podemos analizar a las integrantes de ANFASEP con estándares urbanos, es claro que iban a ver diferencias en su vinculación con el Estado y en el ejercicio de su ciudadanía. No basta con concluir que las integrantes de ANFASEP tenían un nivel incipiente de ciudanía, sus trayectorias previas al conflicto armado, nos invitan a mirar el contexto sociopolítico que ha creado esta situación.

Igualmente, hay que problematizar que en las narraciones sobre sus vivencias tempranas, las presidentas de ANFASEP idealizan la vida de las comunidades (destacan las fiestas, el compartir, la unión), sin embargo silencian u olvidan las tensiones vinculados con la violencia familiar, violencia sexual y los cambios sociopolíticos que se vivían en Ayacucho antes del conflicto. Esto en parte se debería a que la memoria de las mujeres está relacionada sobre todo a los ciclos reproductivos y la vida cotidiana. Las narraciones sobre sus infancias deben entenderse desde los estudios de memoria que plantean que la memoria siempre es selectiva, las personas y en este caso las presidentas de ANFASEP construyen relatos seleccionando qué y qué no narrar, las narrativas sobre sus vivencias pasadas no son estáticas. Por el contrario, estas son dinámicas y fluidas y se recrean, también, de acuerdo al momento en el que se narra. Sus narraciones también deben entenderse desde sus roles de género, por eso mismo principalmente han relatado sobre su maternidad y sus interacciones familiares.

*5. A manera de conclusión: usos de la memoria en el post-conflicto armado*

¿Por qué desde la academia y desde el movimiento de derechos humanos se optó por esencializar a las integrantes/presidentas de ANFASEP en la dicotomía de víctimas y/o heroínas?, y ¿por qué las propias mujeres, en este caso las presidentas de ANFASEP, silenciaron sus agencias e identidades previas?, ¿cuál es la imagen de sí mismas que quieren que ahora prevalezca? Las respuestas tiene tres sentidos: la emergencia, la memoria y el momento post-conflicto en el que se narra.

La situación de emergencia en la que vivíamos el conflicto armado nos llevo a elaborar estrategias, y en este caso estrategias identitarias que permitieran atender la situación de vulnerabilidad de las personas que vivían directamente el conflicto. Con el “nos” me refiero activistas e instituciones de derechos humanos y a la academia de ciencias sociales y jurídicas que desde la perspectiva de justicia transicional nos centramos en identificar víctimas, victimarios, dinámicas y patrones de afectación. Ante las sistemáticas violaciones a los derechos humanos, desde distintas vertientes, se optó por la categoría de víctima, como una estrategia para hablar, enfrentar y/o situarse ante el conflicto armado.[[21]](#endnote-22) Sin embargo, esto homogeneizó y por lo tanto des-empoderó y sin quererlo contribuyó a la construcción y potenciación de las dicotomías urbano-rural, letrado- iletrado, castellano-hablantes-quechua-hablantes. Si bien en las interacciones humanas siempre hay relaciones de poder y subalternización, durante el conflicto estas se ahondaron y fortalecieron. Esto no sólo se dio en el ámbito del activismo sino también se trasladó a los espacios de producción de conocimientos. No planteo en absoluto que desde estos espacios se haya reflexionado conscientemente a las mujeres de ANFASEP como inferiores. En el contexto de guerra y ante la emergencia nos centramos en su testimonio de violencia y en la forma como se habían vulnerado sus derechos humanos, destacamos sus roles como sobrevivientes, heroínas, luchadoras. Sin embargo, olvidamos los matices sobre sus identidades y diferencias.

Bhabha (2011) señala que el estereotipo no es una simplificación por ser una falsa representación de la realidad, es una simplificación porque fija la representación y niega la diferencia. Mohanty (2008) cuestiona la producción epistemológica que se hace de la mujer del tercer mundo como un sujeto monolítico y coherente con intereses y deseos idénticos. Esto niega las diferencias sexuales, de clase social, étnicas y geográficas. Las narraciones que he hecho sobre las vivencias tempranas de las presidentas de ANFASEP contrastan con las caracterizaciones académicas producidas sobre ellas. Por mucho tiempo ha existido una simplificación y generalización de su realidad que ha fijado y negado sus diferencias, lo que ha contribuido a elaborar estereotipos que jerarquizan e invisibilizan procesos personales y sociales previos al conflicto armado.

Es pertinente contextualizar la crítica que ahora planteo, estamos en un proceso post-conflicto que nos permite mirar otras dimensiones de los actores del conflicto y también les permite a las presidentas de ANFASEP enfocarse y narrarse desde otras dimensiones y momentos de sus historias.[[22]](#endnote-23) Levi (2011) planteó que nuestros recuerdos no están grabados sobre piedra, no sólo tienden a borrarse con los años sino que, con frecuencia, se modifican o incluso aumentan literalmente, incorporando nuevas y distintas facetas de nuestras experiencias de vida. Esto es clave en procesos de transición. Para el contexto argentino, Quintana (2015) y Cepeda (2013) sugieren que el análisis de los procesos de subjetivización de Abuelas de Plaza de Mayo y de HIJOS permite problematizar las dicotomías, lo que muestra que no hay órdenes y representantes puros sino actos performativos que subvierten prácticas y discursos. De acuerdo a estos autores, lo que se narra en momentos de la post-dictadura en Argentina muchas veces puede ser una estrategia para enfrentar este nuevo momento de la historia personal, familiar y social.[[23]](#endnote-24) Para el caso chileno, Lazzara (2014) se refiere a esto como una narración y construcción de un auto-relato “entre épocas” donde se inventa un nuevo yo de militante de izquierda en la post-dictadura.[[24]](#endnote-25) Las presidentas de ANFASEP narran sobre sus vivencias previas al conflicto en una nueva temporalidad de post-conflicto, cada una tiene distintas formas de acudir al recuerdo pero hay ejes transversales en sus historias, denominadores comunes en contextos sociopolíticos y culturales distintos. Millones (2013) concluye que las mujeres afectadas por el conflicto armado en un momento de post-conflicto consciente o inconscientemente aspiran construirse un pasado distinto y por lo tanto una forma distinta de situarse en el presente. Para el caso que aquí analizo, la narración de su vinculación con el trabajo en la infancia, la idealización de la vida en las comunidades, sus logros educativos iniciales y la migración con aspiraciones distintas nos hablan de elementos de una forma distinta de representarse así mismas en el post-conflicto, esto es el resultado de confrontaciones y jerarquizaciones de los sucesos y vivencias que fundan un nuevo relato sobre sí mismas. Esto no anula ni borra sus auto-representaciones previas, más bien las amplia y enriquece. En los procesos de transición, las identidades también transitan y se reconstruyen y transforman en dialogo con las nuevas coyunturas sociopolíticas. En estos contextos no solo cambian las agendas y actores también cambian las memorias, auto-relatos y por lo tanto los sentidos de identidad. Esto podría tener varias lecturas, puede significar una estrategia para enfrentar el nuevo momento de su historia personal y social, es un rescate de la memoria de sus primeros ciclos de vida donde hay disputas y usos políticos en el sentido más amplio de la palabra y/o hay una apropiación de su propia historia y memoria que ahora es elaborada y reelaborada de forma más consciente.

Durante el conflicto armado, las presidentas de ANFASEP enarbolando la demanda por la vida de un familiar llegaron a cuestionar las prácticas represivas del Estado y plantear exigencias vinculadas con el respeto a los derechos humanos. Este fue un discurso no sólo de ellas como mujeres que lideran una organización sino también fue un discurso que muchas integrantes de ANFASEP asumieron para demandar reparación y justicia. Ahora, en un contexto post-conflicto armado su mandato es la memoria para que haya justicia. En términos teóricos, hacer “política de la memoria” en su apuesta por el “para que no se repita”. La función colectiva de hacer memoria sitúa a las presidentas de ANFASEP —en tanto representantes de una organización— como parte de una comunidad afectiva más amplia, esto les permite construirse un lugar en la historia y en la sociedad pero también les da reconocimiento y sentido de pertenencia. Conocer sus vivencias previas al conflicto armado nos permite humanizarlas más y situar sus respuestas al conflicto en un contexto familiar, social y político más amplio. Esta agencia para re-elaborar o re-construir la memoria de sus primeros ciclos de vida les permite construir y re-crear nuevos sentidos de sus identidades. En estas narraciones hay una negociación consigo mismas sobre como representarse en el post- conflicto y un inicio para cuestionar estereotipos que invisibilizan, niegan y silencian. La pregunta es si esta reconfiguración de memorias sobre sus primeros ciclos de vida también tendrá eco entre las otras mujeres que integran ANFASEP. Es un proceso del que habrá que estar pendiente.

# *Referencias*

ANFASEP

2007 ¿Hasta cuándo tu silencio? Testimonios de dolor y coraje. Ayacucho: ANFASEP.

Ataurima, Jorge

2001 Participación pública de la mujer en Huamanga (1825 – 1835). Tesis de Licenciatura. Universidad Nacional San Cristóbal de Huamanga.

Bhabha, Homi

2011 El lugar de la cultura. Buenos Aires: Manantial.

Cepeda, Agustina

2013 “Narrativas familiares y memorias post dictadura en Argentina: El caso de HIJOS de Desaparecidos.” Asia Journal of Latin American Studies 1 (Vol. 26): 25-45.

Comisión de la Verdad y Reconciliación

2003 Informe Final. Lima: CVR.

Comisión de Derechos Humanos

2001 Memoria para los ausentes. Desaparecidos en el Perú 1982 – 1996. Lima: Comisedh.

Cóndor, Nory

2007 Invisibilización y victimización de ANFASEP en la lucha por la defensa de los derechos humanos en Ayacucho. Tesis de Licenciatura. Universidad Nacional San Cristóbal de Huamanga.

Craske, Nikki

1999 *Women and Politics in Latin America*. New Brunswick: Rutgers University Press.

Crisóstomo Meza, Mercedes

2014 Género, conflicto armado y memoria. Trayectorias de las Presidentas de ANFASEP. Tesis de Maestría. Pontificia Universidad Católica del Perú.

Degregori, Carlos Iván

2010 El surgimiento de Sendero Luminoso. Ayacucho 1969 – 1979. Lima: IEP.

1986 Ayacucho, raíces de una crisis. Ayacucho: Instituto de Estudios Regionales José María Arguedas.

Defensoría del Pueblo

2002 La desaparición forzada de personas en el Perú. Lima: Defensoría del Pueblo.

Earls Jhon y Irene Silverblatt

1977 “El matrimonio y la autoconstrucción de alianzas en Sarhua (Ayacucho –Perú)”. Bulletin de IÍFEA 6 (1-2): 63-70.

Ely Richard y Allysa Mccabe

2009 “Gender Differences in Memories for Speech,” pp.17-30 en Selma Leydesdorff y otros (ed.), Gender and Memory. London: Transaction Publishers.

González, Natalia

1999 “El gremio de vivanderas en la Huamanga de los siglos XIX y XX,” pp. 259-273 en Margarita Zegarra (ed.), Mujeres y Género en la Historia del Perú. Lima: CEDOC.

Jelin, Elizabeth

2012 Los trabajos de la memoria. Lima: IEP.

2001 “Historia, memoria social y testimonio o la legitimidad de las palabra.” Iberoamericana Nuevo Época 1 (Vol. 1): 87-97.

Lazzara, Michael

2014 “Pensar entre épocas: escrituras de vida y transformación subjetiva en el Chile post Pinochet.” Cuadernos de Literatura 36 (julio-diciembre): 166-183.

Levi, Primo

2011 Los hundidos y los salvados. Barcelona: Aleph Editores.

Leydesdorff Selma; Passerini Luisa; Paul Tompson

2009 Gender and memory. London: Transaction Publishers.

Millones, Rosela

2013 La elaboración del recuerdo en la construcción de la memoria post conflicto. Tesis de Maestría. Pontificia Universidad Católica del Perú.

Mohanty, Chandra

2008 “Bajo los ojos de Occidente: academia feminista y discurso colonial,” pp. 112-161 en Lilian Suárez y Rosalía Hernández (ed.), Descolonizando el feminismo. Teorías y prácticas desde los márgenes. Madrid: Ediciones Cátedra.

Molyneux, Maxine

2001 *Women’s Movements in International Perspective: Latin America and Beyond*. Basingstoke: Palgrave.

Muñoz, Hortensia

1999 “Derechos humanos y construcción de referentes sociales,” pp. 435-454 en Steve Stern (ed.), Los senderos insólitos del Perú: guerra y sociedad 1980-1995. Lima: IEP.

Pollak, Michael

2006 Memoria, olvido, silencio. La producción social de identidades frente a situaciones limite. Buenos Aires: Ediciones Al Margen.

Quintana, María

2015 “Sujeciones discursivas/desplazamientos retóricos: Emergencia (y agencia) de Abuelas de Plaza de Mayo entre el parentesco y Estado.” Revista Nomadias 19 (julio): 31-48.

Reynaga, Gumersinda

2008 Respuestas de las mujeres ayacuchanas frente a los problemas de la violencia política. Tesis de Maestría. Pontificia Universidad Católica del Perú.

Ruiz-Bravo, Patricia

2004 “Andinas y criollas: identidades femeninas en el medio rural peruano,” pp. 283-319 en Norma Fuller (ed.), Jerarquías en jaque. Estudios de género en el área andina. Lima: Red para el Desarrollo de las Ciencias Sociales.

Sommer, Doris

2005 Abrazos y rechazos. Cómo leer en clave menor. Bogotá: Fondo de Cultura Económica.

Tamayo, Ana María

2003 “ANFASEP y la lucha por la memoria de sus desaparecidos (1983-2000),” pp. 95-134 en Carlos Iván Degregori y otros (ed.), Jamás tan cerca arremetió tan lejos. Memoria y violencia política en el Perú. Lima: IEP.

Todorov, Tzvetan

2010 Los abusos de la memoria. Buenos Aire: Paidós.

Urrutia, Jaime

1982 Comerciantes, arrieros y viajeros huamanguinos, 1770-1870. Tesis de Licenciatura. Universidad Nacional San Cristóbal de Huamanga.

Velapatiño, Aytor

2003 Declive del arrieraje y nuevas vías de comunicación (Huamanga: 1920-1930). Informe de bachillerato. Universidad Nacional San Cristóbal de Huamanga.

Zapata Antonio y otros

2008 Historia y Cultura de Ayacucho. Lima: Fondo de las Naciones Unidas para la Infancia e IEP.

1. Agradezco a los revisores de Latin American Perspective por los comentarios y sugerencias que me dieron para mejorar este artículo. [↑](#endnote-ref-2)
2. El objetivo del PCP-SL fue crear un Estado de inspiración maoísta. [↑](#endnote-ref-3)
3. Recientes estudios están cuestionado esta perspectiva. Por ejemplo, Fumerton (2002), Theidon (2004), La Serna (2012), Del Pino (2008, 2017), Meza (2016) plantean que los campesinos fueron actores que formaron del PCP-SL, así como de las Fuerzas Armadas a través de las rondas campesinas. [↑](#endnote-ref-4)
4. El conflicto armado atravesó tres gobiernos: Fernando Belaunde (1980-1985), Alan García (1985-1990), Alberto Fujimori (1990-2000). [↑](#endnote-ref-5)
5. Cuaderno de actas de ANFASEP, testimonios y documentos entregados a la CVR. [↑](#endnote-ref-6)
6. Este artículo se basa en mi tesis de la maestría en estudios de género en la Pontificia Universidad Católica del Perú. La investigación se realizó el 2014 en Ayacucho. [↑](#endnote-ref-7)
7. En el Perú, paralelamente y debido a la crisis económica de 1980, en las ciudades se crearon otras organizaciones de mujeres organizadas a través de los comedores populares. ANFASEP no tuvo mayor relación con estas debido a que sus demandas eran diversas. [↑](#endnote-ref-8)
8. “Los Cabitos” fue una base militar en Ayacucho, considerada el mayor centro clandestino de entierro del país. [↑](#endnote-ref-9)
9. En mérito a sus años de lucha, ANFASEP, mediante su fundadora y presidenta honoraria Angélica Mendoza ha recibido múltiples premios nacionales e internacionales. [↑](#endnote-ref-10)
10. ANFASEP es parte de la Coordinadora Nacional de Organizaciones de Afectados por la Violencia Política (CONAVIP), creada después de la entrega del Informe Final de la CVR. [↑](#endnote-ref-11)
11. Ello con ayuda de la cooperación alemana. [↑](#endnote-ref-12)
12. No hay muchos estudios que analicen la trayectoria de ANFASEP y/o sus integrantes. Eso pese a ser la primera de su tipo creada en el Perú. En la universidad de Ayacucho sólo hay una tesis sobre ANFASEP. En la Red Peruana de Tesis Digitales no se registra ninguna. En ANFASEP señalan que investigadores extranjeros los visitan “para estudiarlos” pero aún no les han entregado los resultados de sus investigaciones. Por ello, aquí me es imposible dar cuenta de todos estos trabajos. [↑](#endnote-ref-13)
13. Otros investigadores como y Feldman (2012), Milton y Ulfe (2014) y Sastre (2016) se han centrado en analizar el museo de la memoria de ANFASEP y la política de memoria (discursos y sentidos) que allí despliegan. [↑](#endnote-ref-14)
14. Las entrevistas a Angélica se hicieron en quechua, por ello agradezco a la antropóloga Nory Cóndor por su valioso apoyo. [↑](#endnote-ref-15)
15. Todas las citas textuales de las entrevistas realizadas a las presidentas de ANFASEP se presentan entre comillas. Las entrevistas fueron realizadas en el 2014 en Ayacucho. Para realizar las entrevistas se aplicó el protocolo de consentimiento informado. [↑](#endnote-ref-16)
16. Para la época símbolo de conocimientos y prestigio. [↑](#endnote-ref-17)
17. Felicitas formalmente no ha sido elegida presidenta de ANFASEP pero en muchas ocasiones remplazó a las presidentas y ha sido parte de la junta directiva en muchos periodos. [↑](#endnote-ref-18)
18. El 26 de enero de 1983, ocho periodistas fueron asesinados en la comunidad de Uchuraccay. El gobierno de Fernando Belaúnde formó una Comisión Investigadora presidida por Mario Vargas Llosa que investigó el caso en un mes y culpabilizó a los campesinos. [↑](#endnote-ref-19)
19. La CVR cuestiona este informe y explica que la población de Uchuraccay estaba conectada al país mediante las escuelas, la migración y el conocimiento del sistema jurídico a través de sus autoridades. [↑](#endnote-ref-20)
20. Sin embargo, en un balance crítico, señalan que su educación era memorística, en castellano y tenían dificultad para comunicarse con sus docentes. Además se empleaban medios coercitivos para lograr que los niños memoricen las lecciones. [↑](#endnote-ref-21)
21. Laura Tejero (204) en *“Nosotras las víctimas”: violencia, justicia transicional y subjetividades políticas en el contexto peruano de recuperación posconflicto,* Mijke Waardt(2013) *en Are Peruvians Victims Being Mockerd?: Politicization of Victimhood and Victims´Motivations for Reparations* y Maria Eugenia Ulfe (2013) en *¿Y después de la violencia que queda? víctimas, ciudadanos y reparaciones en el contexto post-CVR en el Perú* plantean debates sobre la noción de víctimas en el post-conflicto armado interno peruano. [↑](#endnote-ref-22)
22. Para un recuento de las características de la etapa post-conflicto en el Perú véase “A road less traveled by” de David Scott Palmer. [↑](#endnote-ref-23)
23. En Argentina entre 1976-1983 una junta militar liderada por Rafael Videla estableció un terrorismo de Estado que causó graves violaciones a los derechos humanos. [↑](#endnote-ref-24)
24. En Chile la dictadura militar dirigida por Augusto Pinochet gobernó el país a través de la junta militar de gobierno entre 1973 y 1990. [↑](#endnote-ref-25)
